# Supplementary material for: Integrating special education in community and non-formal education in Kenya
Source: Springer Nature journal article supplement (doi:10.1007/s40123-023-00688-y), 1995-01-01
Supplement: 40123_2023_688_MOESM1_ESM.pdf [file 40123_2023_688_MOESM1_ESM.pdf]

# Supplementary material

## Cost-utility analysis of deep learning and trained human graders for diabetic retinopathy screening in a nationwide program

Attasit Srisubat<sup>1</sup>, Kankamon Kittrongsiri<sup>2</sup>, Sermsiri Sangroongruangsri<sup>3\*</sup>, Chalida Khemvaranan<sup>4</sup>, Jacqueline Baras Shreibati<sup>5</sup>, Jack Ching<sup>5</sup>, John Hernandez<sup>5</sup>, Richa Tiwari<sup>5</sup>, Fred Hersch<sup>5</sup>, Yun Liu<sup>5</sup>, Prut Hanutsaha<sup>6</sup>, Varis Ruamviboonsuk<sup>7</sup>, Saowalak Turongkaravee<sup>3</sup>, Rajiv Raman<sup>8</sup>, and Paisan Ruamviboonsuk<sup>9\*</sup>

<sup>1</sup>Department of Medical Services, Ministry of Public Health, Nonthaburi, Thailand

<sup>2</sup>Social, Economic and Administrative Pharmacy (SEAP) Graduate Program, Faculty of Pharmacy, Mahidol University, Bangkok, Thailand

<sup>3</sup>Social and Administrative Pharmacy Division, Department of Pharmacy, Faculty of Pharmacy, Mahidol University, Bangkok, Thailand

<sup>4</sup>Department of Research and Technology Assessment, Lerdsin Hospital, Bangkok, Thailand

<sup>5</sup>Google LLC, Mountain View, California, USA

<sup>6</sup>Department of Ophthalmology, Ramathibodi Hospital, Mahidol University, Bangkok, Thailand

<sup>7</sup>Department of Biochemistry, Chulalongkorn University, Bangkok, Thailand

<sup>8</sup>Sri Bhagwan Mahavir Vitreoretinal Services, Sankara Nethralaya, Chennai, Tamil Nadu, India

<sup>9</sup>Department of Ophthalmology, Rajavithi Hospital, College of Medicine, Rangsit University, Bangkok, Thailand

\*Corresponding authors, emails: paisan.trs@gmail.com; ningsermsiri@gmail.com

## **Consolidated Health Economic Evaluation Reporting Standards (CHEERS) 2022 Checklist.**

| Topic                                                   | No. | Item                                                                                                                                            | Location where item is reported                                                         |
|---------------------------------------------------------|-----|-------------------------------------------------------------------------------------------------------------------------------------------------|-----------------------------------------------------------------------------------------|
| <b>Title</b>                                            | 1   | Identify the study as an economic evaluation and specify the interventions being compared.                                                      | Title                                                                                   |
| <b>Abstract</b>                                         | 2   | Provide a structured summary that highlights context, key methods, results, and alternative analyses.                                           | ABSTRACT                                                                                |
| <b>Introduction</b>                                     |     |                                                                                                                                                 |                                                                                         |
| <b>Background and objectives</b>                        | 3   | Give the context for the study, the study question, and its practical relevance for decision making in policy or practice.                      | Introduction; paragraph 1-6                                                             |
| <b>Methods</b>                                          |     |                                                                                                                                                 |                                                                                         |
| <b>Health economic analysis plan</b>                    | 4   | Indicate whether a health economic analysis plan was developed and where available.                                                             | Methods: Model Structure; paragraph 1-3                                                 |
| <b>Study population</b>                                 | 5   | Describe characteristics of the study population (such as age range, demographics, socioeconomic, or clinical characteristics).                 | Methods; Target Population; paragraph 1                                                 |
| <b>Setting and location</b>                             | 6   | Provide relevant contextual information that may influence findings.                                                                            | Methods: paragraph 1                                                                    |
| <b>Comparators</b>                                      | 7   | Describe the interventions or strategies being compared and why chosen.                                                                         | Methods: Screening Strategies; paragraph 1                                              |
| <b>Perspective</b>                                      | 8   | State the perspective(s) adopted by the study and why chosen.                                                                                   | Methods: Model Structure; paragraph 1                                                   |
| <b>Time horizon</b>                                     | 9   | State the time horizon for the study and why appropriate.                                                                                       | Methods: Model Structure; paragraph 1                                                   |
| <b>Discount rate</b>                                    | 10  | Report the discount rate(s) and reason chosen.                                                                                                  | Methods: Model Structure; paragraph 1                                                   |
| <b>Selection of outcomes</b>                            | 11  | Describe what outcomes were used as the measure(s) of benefit(s) and harm(s).                                                                   | Methods: Result Presentation                                                            |
| <b>Measurement of outcomes</b>                          | 12  | Describe how outcomes used to capture benefit(s) and harm(s) were measured.                                                                     | Methods: Model Input Parameters (Health Utilities); paragraph 1 and Result Presentation |
| <b>Valuation of outcomes</b>                            | 13  | Describe the population and methods used to measure and value outcomes.                                                                         | Methods: Model Input Parameters (Health Utilities); paragraph 1 and Result Presentation |
| <b>Measurement and valuation of resources and costs</b> | 14  | Describe how costs were valued.                                                                                                                 | Methods: Model Input Parameters (Costs); paragraph 1-5, Figure 2                        |
| <b>Currency, price date, and conversion</b>             | 15  | Report the dates of the estimated resource quantities and unit costs, plus the currency and year of conversion.                                 | Methods: Model Input Parameters (Costs); paragraph 1-5                                  |
| <b>Rationale and description of model</b>               | 16  | If modelling is used, describe in detail and why used. Report if the model is publicly available and where it can be accessed.                  | Methods: Model Structure; paragraph 1-3, Figure 1a and 1b                               |
| <b>Analytics and assumptions</b>                        | 17  | Describe any methods for analyzing or statistically transforming data, any extrapolation methods, and approaches for validating any model used. | Methods: Model structure, Model Input Parameters, Uncertainty analyses                  |

| Topic                                                                        | No. | Item                                                                                                                                                                          | Location where item is reported                                                                                                               |
|------------------------------------------------------------------------------|-----|-------------------------------------------------------------------------------------------------------------------------------------------------------------------------------|-----------------------------------------------------------------------------------------------------------------------------------------------|
| <b>Characterizing heterogeneity</b>                                          | 18  | Describe any methods used for estimating how the results of the study vary for subgroups.                                                                                     | Not applicable                                                                                                                                |
| <b>Characterizing distributional effects</b>                                 | 19  | Describe how impacts are distributed across different individuals or adjustments made to reflect priority populations.                                                        | Not applicable                                                                                                                                |
| <b>Characterizing uncertainty</b>                                            | 20  | Describe methods to characterize any sources of uncertainty in the analysis.                                                                                                  | Methods: Uncertainty Analyses (Parameter uncertainty; Scenario analysis)                                                                      |
| <b>Approach to engagement with patients and others affected by the study</b> | 21  | Describe any approaches to engage patients or service recipients, the general public, communities, or stakeholders (such as clinicians or payers) in the design of the study. | Not applicable (However, authors included retina specialists, a representative from the Ministry of Public Health, academia, and researchers) |
| <b>Results</b>                                                               |     |                                                                                                                                                                               |                                                                                                                                               |
| <b>Study parameters</b>                                                      | 22  | Report all analytic inputs (such as values, ranges, references) including uncertainty or distributional assumptions.                                                          | Methods: Model Input Parameters and Table 1                                                                                                   |
| <b>Summary of main results</b>                                               | 23  | Report the mean values for the main categories of costs and outcomes of interest and summarize them in the most appropriate overall measure.                                  | Results; paragraph 1-2; Table 2 and Figure 3                                                                                                  |
| <b>Effect of uncertainty</b>                                                 | 24  | Describe how uncertainty about analytic judgments, inputs, or projections affect findings. Report the effect of choice of discount rate and time horizon, if applicable.      | Results: paragraph 3-4; Figure 4-7                                                                                                            |
| <b>Effect of engagement with patients and others affected by the study</b>   | 25  | Report on any difference patient/service recipient, general public, community, or stakeholder involvement made to the approach or findings of the study                       | Not applicable                                                                                                                                |
| <b>Discussion</b>                                                            |     |                                                                                                                                                                               |                                                                                                                                               |
| <b>Study findings, limitations, generalizability, and current knowledge</b>  | 26  | Report key findings, limitations, ethical or equity considerations not captured, and how these could affect patients, policy, or practice.                                    | Discussion; paragraph 1-8                                                                                                                     |
| <b>Other relevant information</b>                                            |     |                                                                                                                                                                               |                                                                                                                                               |
| <b>Source of funding</b>                                                     | 27  | Describe how the study was funded and any role of the funder in the identification, design, conduct, and reporting of the analysis                                            | Funding                                                                                                                                       |
| <b>Conflicts of interest</b>                                                 | 28  | Report authors conflicts of interest according to journal or International Committee of Medical Journal Editors requirements.                                                 | Disclosures                                                                                                                                   |

From: Husereau D, Drummond M, Augustovski F, et al. Consolidated Health Economic Evaluation Reporting Standards 2022 (CHEERS 2022) Explanation and Elaboration: A Report of the ISPOR CHEERS II Good Practices Task Force. Value Health 2022;25.
